# Supplementary material
Source: HighWire-hosted journal article supplement (https://erj.ersjournals.com/content/55/4/1902209)
Supplement: inline-supplementary-material-1 [file inline-supplementary-material-1.pdf]

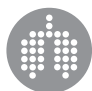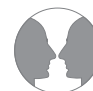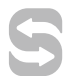

SHAREABLE PDF

# Towards selective tuberculosis screening of people in prison in a low-incidence country

Gerard de Vries<sup>1,2</sup>, Sylvia Commandeur<sup>3</sup>, Connie Erkens<sup>2</sup>, Walid Haddad<sup>4</sup>, Niesje Jansen<sup>2</sup>, Peter Kouw<sup>5</sup> and Margreet Kamphorst-Roemer<sup>6</sup>

**Affiliations:** <sup>1</sup>Centre for Infectious Diseases Control, National Institute for Public Health and the Environment, Bilthoven, The Netherlands. <sup>2</sup>KNCV Tuberculosis Foundation, The Hague, The Netherlands. <sup>3</sup>GGD GHOR Nederland, Utrecht, The Netherlands. <sup>4</sup>Dept of TB Control, GGD Hart voor Brabant, Tilburg, The Netherlands. <sup>5</sup>Dept of Infectious Diseases, Public Health Service, Amsterdam, The Netherlands. <sup>6</sup>Dept of Health Care, Custodial Institutions Agency, Ministry of Security and Justice, Utrecht, The Netherlands.

**Correspondence:** Gerard de Vries, National Institute for Public Health and the Environment, Centre for Infectious Diseases Control, Antonie van Leeuwenhoeklaan 9, Bilthoven, 3720 BA, The Netherlands. E-mail: gerard.de.vries@rivm.nl

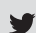

@ERSpublications

**Screening all prisoners in low-incidence countries is not effective. Screening data can help to direct screening activities. Continuity of tuberculosis treatment and care is a major concern in prisoners after their release from prison.** <http://bit.ly/2rzn5l8>

**Cite this article as:** de Vries G, Commandeur S, Erkens C, *et al.* Towards selective tuberculosis screening of people in prison in a low-incidence country. *Eur Respir J* 2020; 55: 1902209 [<https://doi.org/10.1183/13993003.02209-2019>].

This single-page version can be shared freely online.

## To the Editor:

In 2018, 806 tuberculosis (TB) patients were notified in the Netherlands, which was the second lowest number recorded since notification became mandatory in 1980; only 2017 had fewer notified cases (n=783) [1]. In this century, TB notification rates in the Netherlands declined by 50%, from 9.3 patients per 100 000 population in 2001 (1492 patients) to 4.7 per 100 000 in 2018. In 2018, 77% of the TB patients were born outside the Netherlands.
